# Supplementary material for: Mena regulates nesprin-2 to control actin–nuclear lamina associations, trans-nuclear membrane signalling and gene expression
Source: PubMed Central journal article supplement (PMC10036544; doi:10.1038/s41467-023-37021-x), 2023-03-23
Supplement: 41467_2023_37021_MOESM1_ESM.pdf [file 41467_2023_37021_MOESM1_ESM.pdf]

# **Mena regulates nesprin-2 to control actin–nuclear lamina associations, trans-nuclear membrane signalling and gene expression**

---

**Frederic Li Mow Chee et al.**

---

## **Supplementary Information**

Supplementary Figure 1

Supplementary Figure 2

Supplementary Figure 3

Supplementary Figure 4

Supplementary Table 1

Supplementary Table 2

---

Correspondence should be addressed to Adam Byron (e-mail: [adam.byron@manchester.ac.uk](mailto:adam.byron@manchester.ac.uk))

---

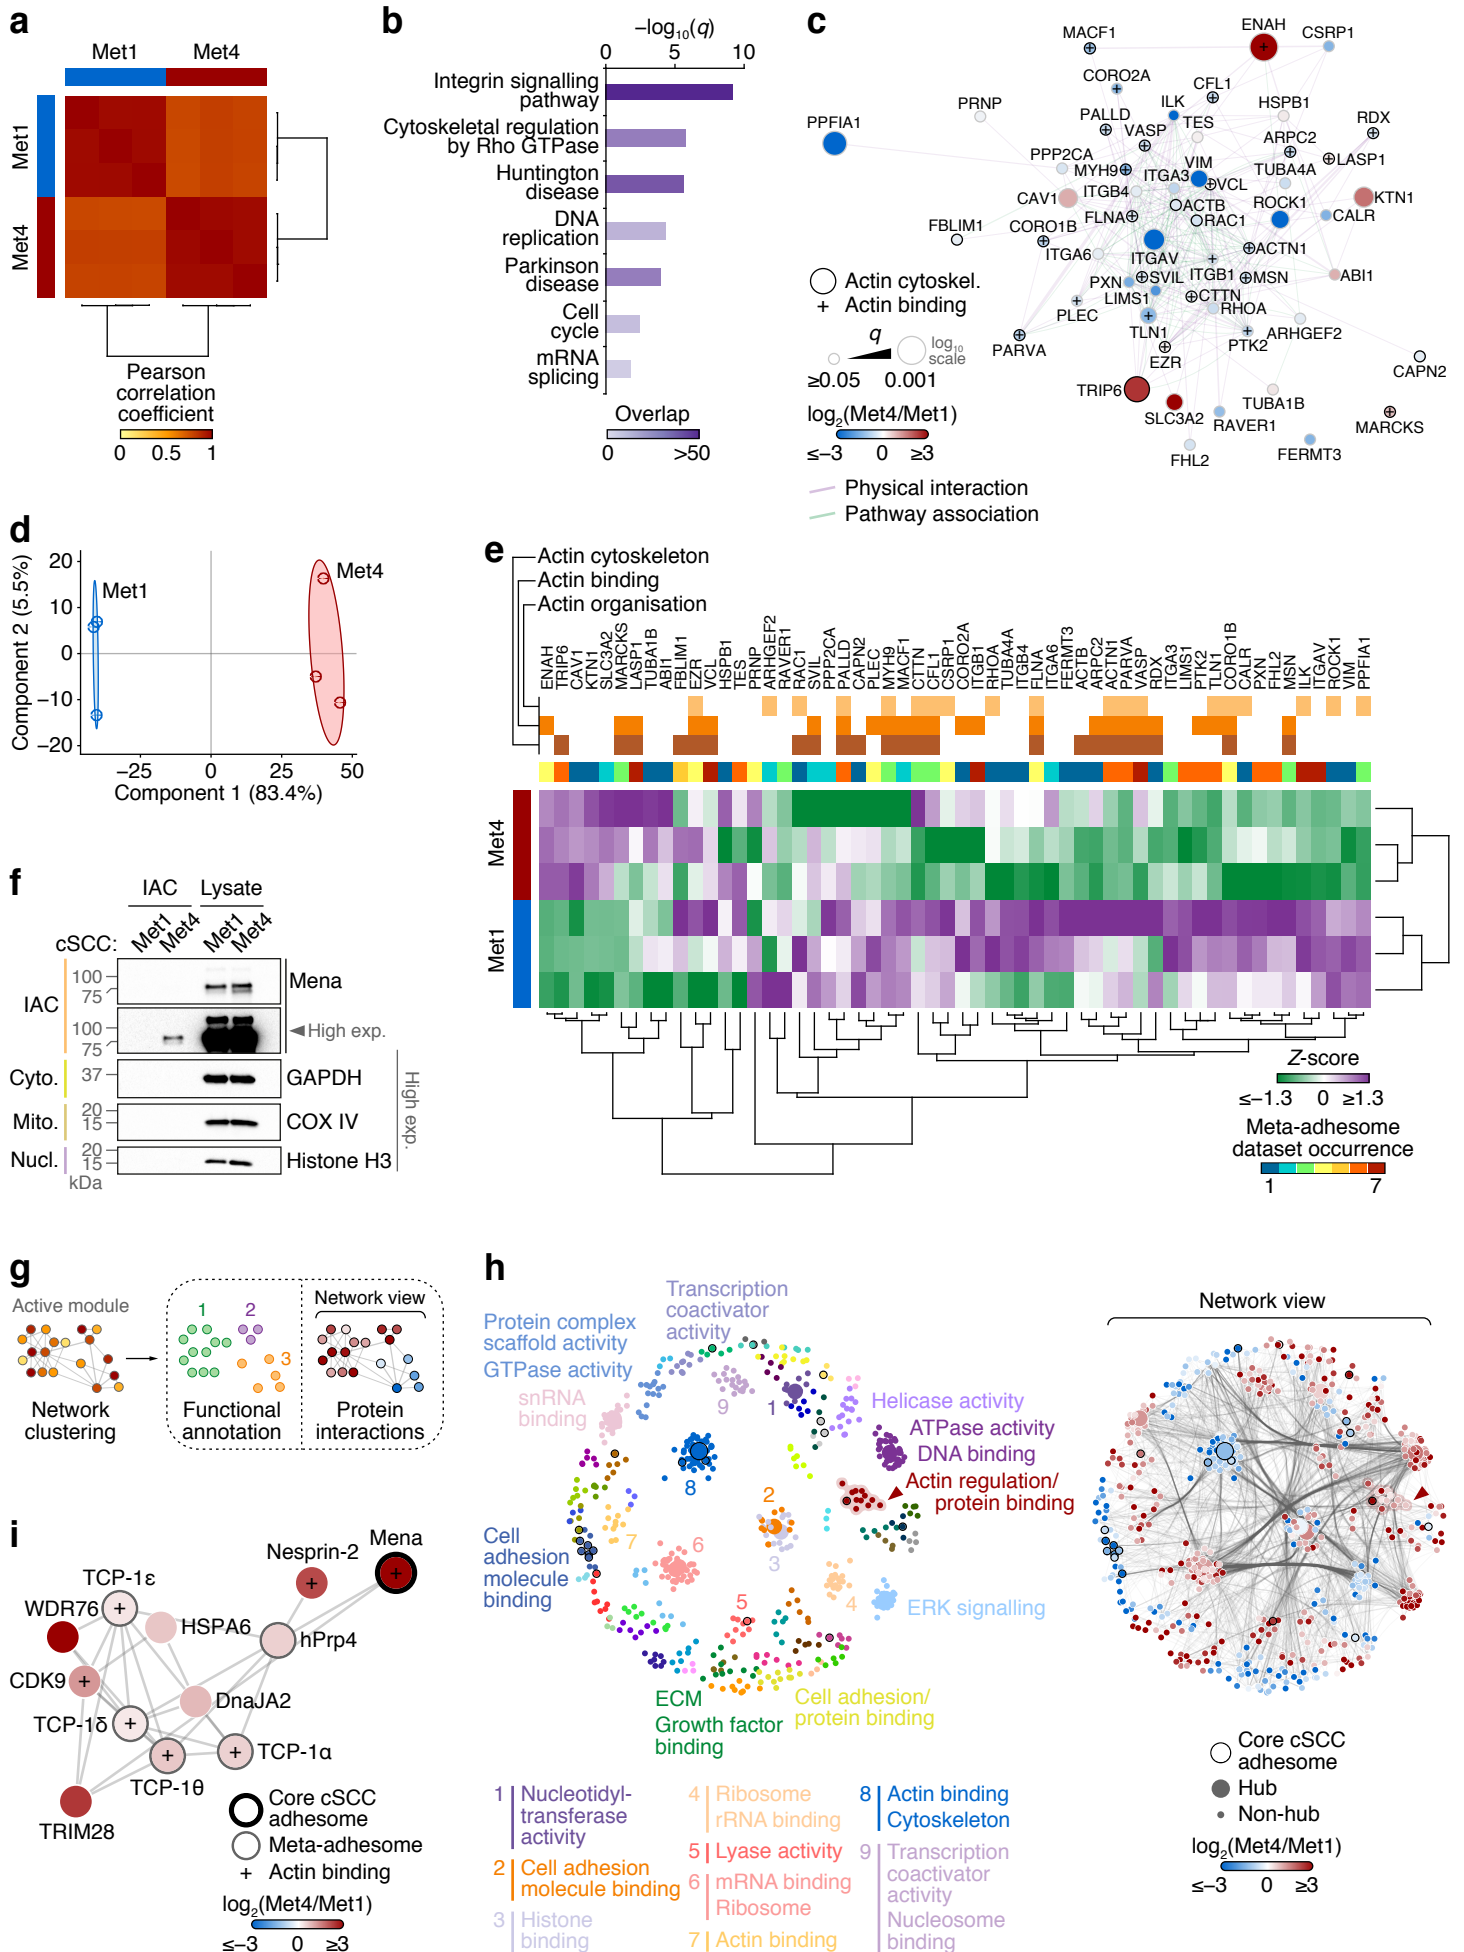

Supplementary Fig. 1 | See next page for caption.

**Supplementary Fig. 1 | Proteomic analysis of patient-derived cSCC IACs.** **a** Sample correlation analysis of mass spectrometric analyses of Met1 and Met4 IACs ( $n = 3$  independent biological replicates). Pearson correlation coefficients for all pairwise sample comparisons were subjected to hierarchical clustering. **b** Over-representation analysis of Panther pathways in the cSCC IAC subproteome. Purple shading intensity indicates size of subproteome overlap with respective gene sets ( $q < 0.05$ , hypergeometric test with Benjamini–Hochberg correction). **c** Functional association network of the core cSCC adhesome. Proteins (nodes) are coloured according to protein enrichment in Met1 or Met4 IACs and annotated with gene names for clarity. Node size represents significance of differential enrichment between Met1 and Met4 IACs (two-sided  $t$ -test with Benjamini–Hochberg correction;  $n = 3$  independent biological replicates). Black node borders indicate actin-cytoskeletal proteins; actin-binding proteins are indicated by a plus sign. **d** Principal component analysis of Met1 and Met4 IACs. **e** Hierarchical cluster analysis of the core cSCC adhesome. Data are as for Fig. 1e with additional annotation. Frequency of occurrence in meta-adhesome datasets is indicated, and proteins are annotated with gene names for clarity. **f** Isolation of Mena in Met4 IACs as determined by western blotting. GAPDH (cyto., cytoplasmic), COX IV (mito., mitochondrial) and histone H3 (nucl., nuclear) were probed as non-adhesion control proteins. Images are representative of three independent experiments. High exp., high exposure of blot. **g** Overview of IAC active module analysis. Dashed box contains graphical representation of the graph-based visualisations shown in (h) and Fig. 1h. Protein clusters were annotated with over-represented functional categories (numbered colours; left) and were displayed with protein quantification and reported physical protein interactions (network view; right). **h** Maximal-scoring active module of the cSCC IAC interactome. The network was derived as for that in Fig. 1h, but it was partitioned using the constant Potts model, resolved for maximum Surprise quality function. Proteins (nodes) are coloured according to assigned cluster (left panel). Molecular functions enriched in protein clusters were determined by Gene Ontology over-representation analysis (the two most significant functional categories are labelled). For protein clusters with fewer than two significant functional categories, clusters were annotated manually with a single representative term. Network view (right panel) shows corresponding protein interactions (edge densities) in the partitioned network; nodes are coloured according to protein enrichment in Met1 or Met4 IACs. The actin regulation cluster detailed in (i) is indicated with a red arrowhead. Large nodes indicate kinless and connector hubs; black node borders indicate core adhesome proteins. **i** Subnetwork analysis of the actin regulation cluster identified by active module partitioning in (h). The weighted subnetwork was clustered using a force-directed algorithm. Nodes are coloured according to protein enrichment in Met1 or Met4 IACs.

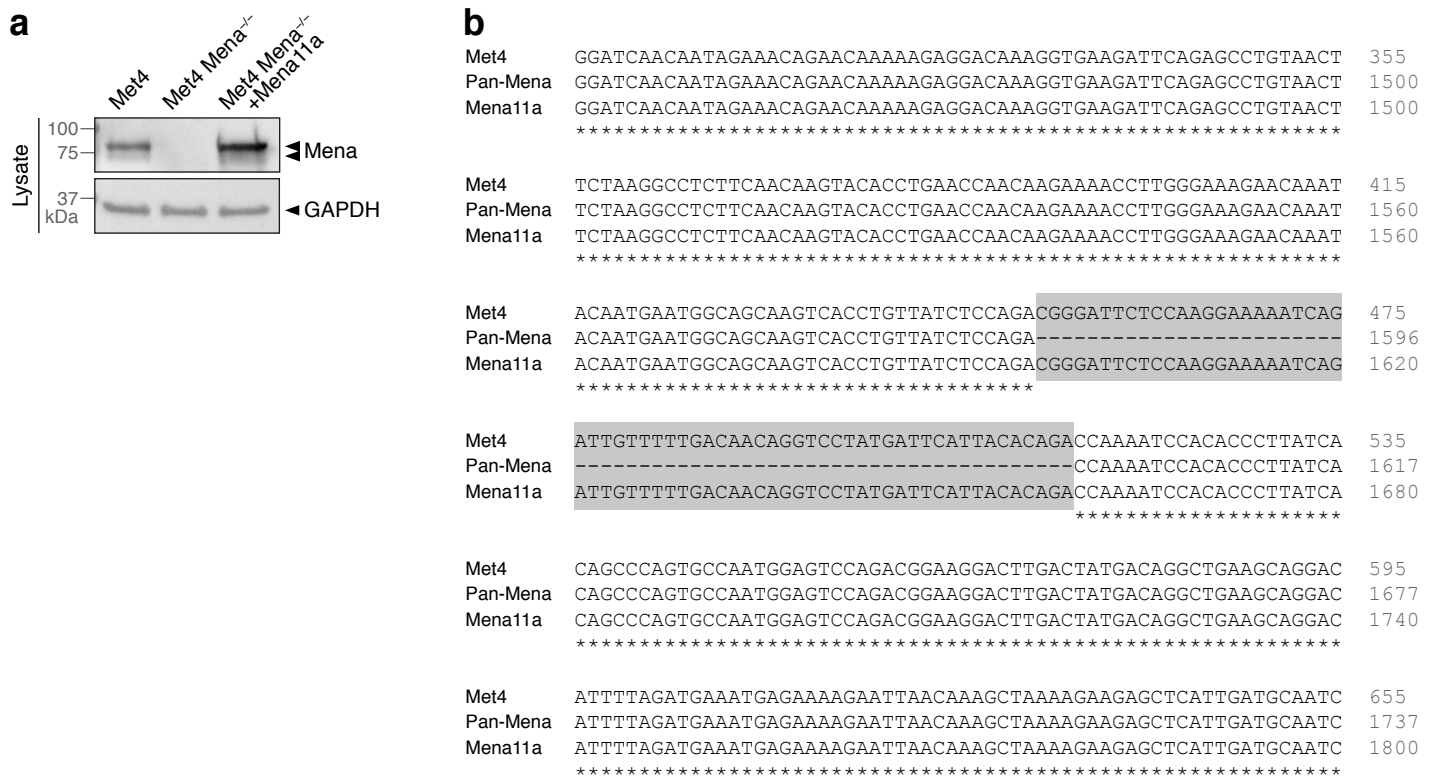

**Supplementary Fig. 2 | Analysis of Mena expression in Met4 cSCC cells.** **a** Western blot analysis of endogenous Mena in parental Met4 cells, absence of Mena in Mena-depleted Met4 cells (Met4 Mena<sup>-/-</sup>) and re-expression of Mena11a in Met4 Mena<sup>-/-</sup> cells (Met4 Mena<sup>-/-</sup> + Mena11a). Images are representative of three independent experiments. **b** Nucleotide sequence alignment of endogenous Mena transcript sequenced from Met4 cells. Mena sequence compared to pan-Mena (GenBank accession KM214203.1) and Mena11a (GenBank accession KM214204.1) coding sequences. Grey boxes indicate the additional Mena11a exon coding sequence. Asterisks indicate exact residue conservation.

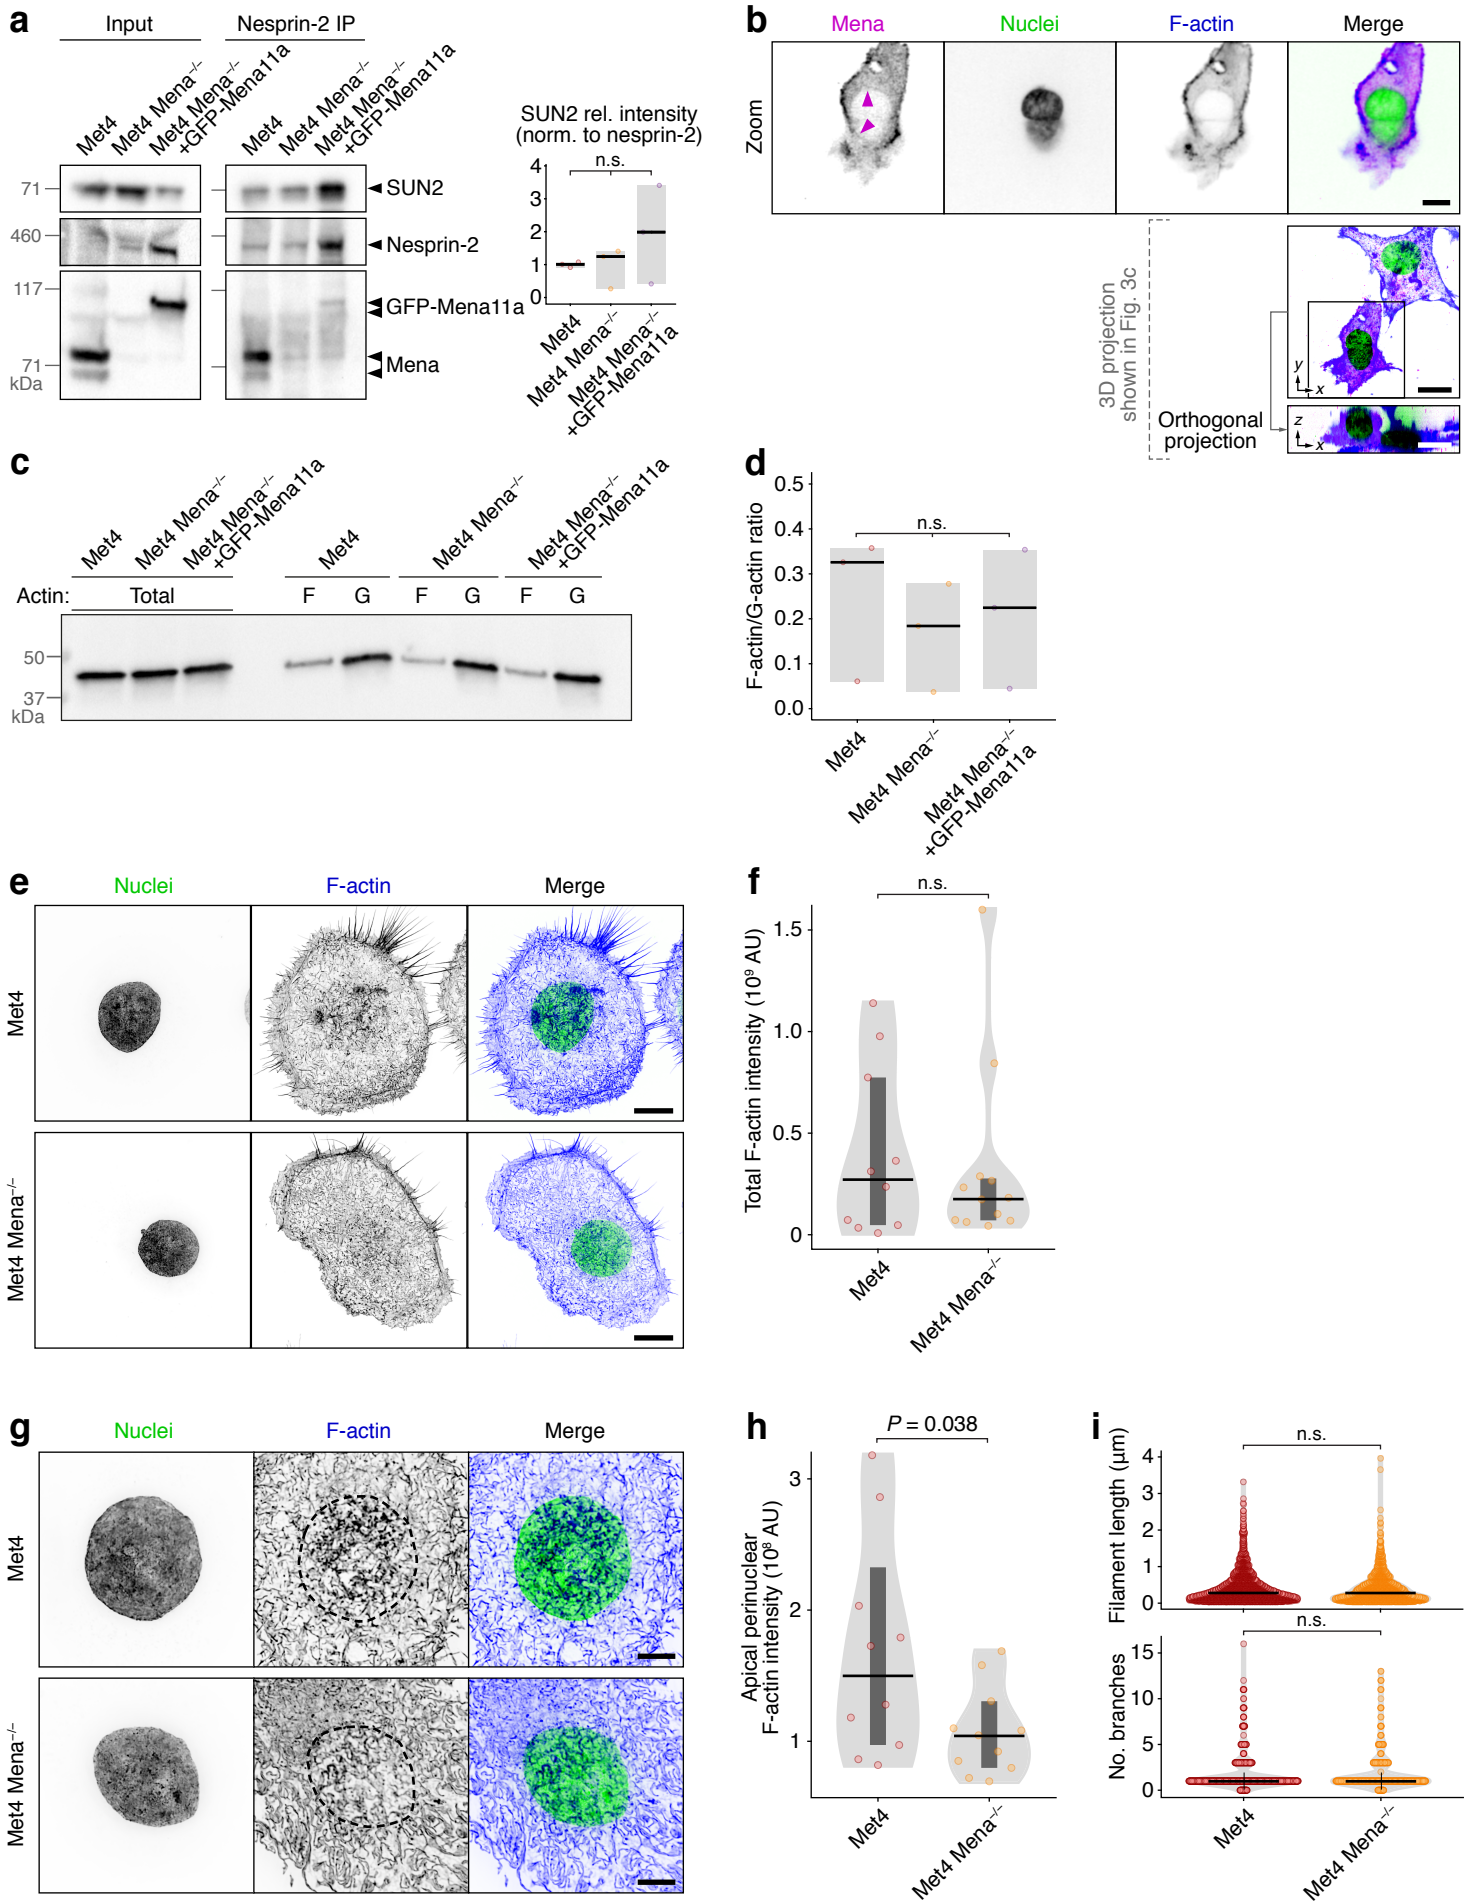

Supplementary Fig. 3 | See next page for caption.

**Supplementary Fig. 3 | Analysis of actin in the presence and absence of Mena.** **a** IP analysis of nesprin-2 protein complexes in Met4 cells, Mena-depleted Met4 cells (Met4 Mena<sup>-/-</sup>) and Met4 Mena<sup>-/-</sup> cells with GFP-Mena11a re-expressed (Met4 Mena<sup>-/-</sup> +GFP-Mena11a). SUN2 was detected by western blotting; densitometric intensities were normalised (norm.) to nesprin-2 and expressed relative (rel.) to Met4 cells (right panel). Black bar, median; light grey box, range. Statistical analysis, one-way ANOVA ( $n = 3$  independent experiments). **b** Spinning-disk confocal imaging of Met4 cells in 3D collagen matrix. 3D projections are from Fig. 3c; zoom images are a single central z-slice. Magenta arrowheads indicate localisation of Mena at the nuclear periphery. Scale bar, 20  $\mu\text{m}$ ; zoom (inset) scale bar, 10  $\mu\text{m}$ . **c** Western blot analysis of polymeric F-actin and monomeric G-actin fractions isolated from Met4, Met4 Mena<sup>-/-</sup> and Met4 Mena<sup>-/-</sup> +GFP-Mena11a cells. **d** Ratios of F-actin to G-actin (see c). Black bar, median; light grey box, range. Statistical analysis, one-way ANOVA ( $n = 3$  independent experiments). **e** Spinning-disk confocal imaging of Met4 cells and Met4 Mena<sup>-/-</sup> cells. Scale bar, 10  $\mu\text{m}$ . **f** Quantification of whole-cell F-actin mean fluorescence intensity (see e). Black bar, median; dark grey box, 95% confidence interval; light grey silhouette, probability density. Statistical analysis, two-sided Mann-Whitney test ( $n = 10$  and 12 cells for Met4 and Met4 Mena<sup>-/-</sup> cells, respectively, from  $n = 3$  independent experiments). **g** Optical pixel reassignment imaging of apical regions of Met4 cells and Met4 Mena<sup>-/-</sup> cells. Nuclear perimeters delimited the regions of interest (dashed black borders). Scale bar, 5  $\mu\text{m}$ . For (b), (e) and (g), nuclei were detected using DAPI; F-actin was detected using phalloidin. Inverted lookup tables were applied. Images are representative of three independent experiments (two for b). **h, i** Quantification of apical perinuclear F-actin mean fluorescence intensity (h) and organisation (i) (see g). Black bar, median; dark grey box, 95% confidence interval; light grey silhouette, probability density. Statistical analysis, two-sided Student's *t*-test ( $n = 10$  and 11 cells for Met4 and Met4 Mena<sup>-/-</sup> cells, respectively, from  $n = 3$  independent experiments) for (h), two-sided Mann-Whitney tests ( $n = 2,218$  and 1,575 actin filaments (length quantification) or  $n = 939$  and 637 actin filaments (branch quantification) for Met4 and Met4 Mena<sup>-/-</sup> cells, respectively, from  $n = 3$  independent experiments) for (i). n.s., not significant.

---

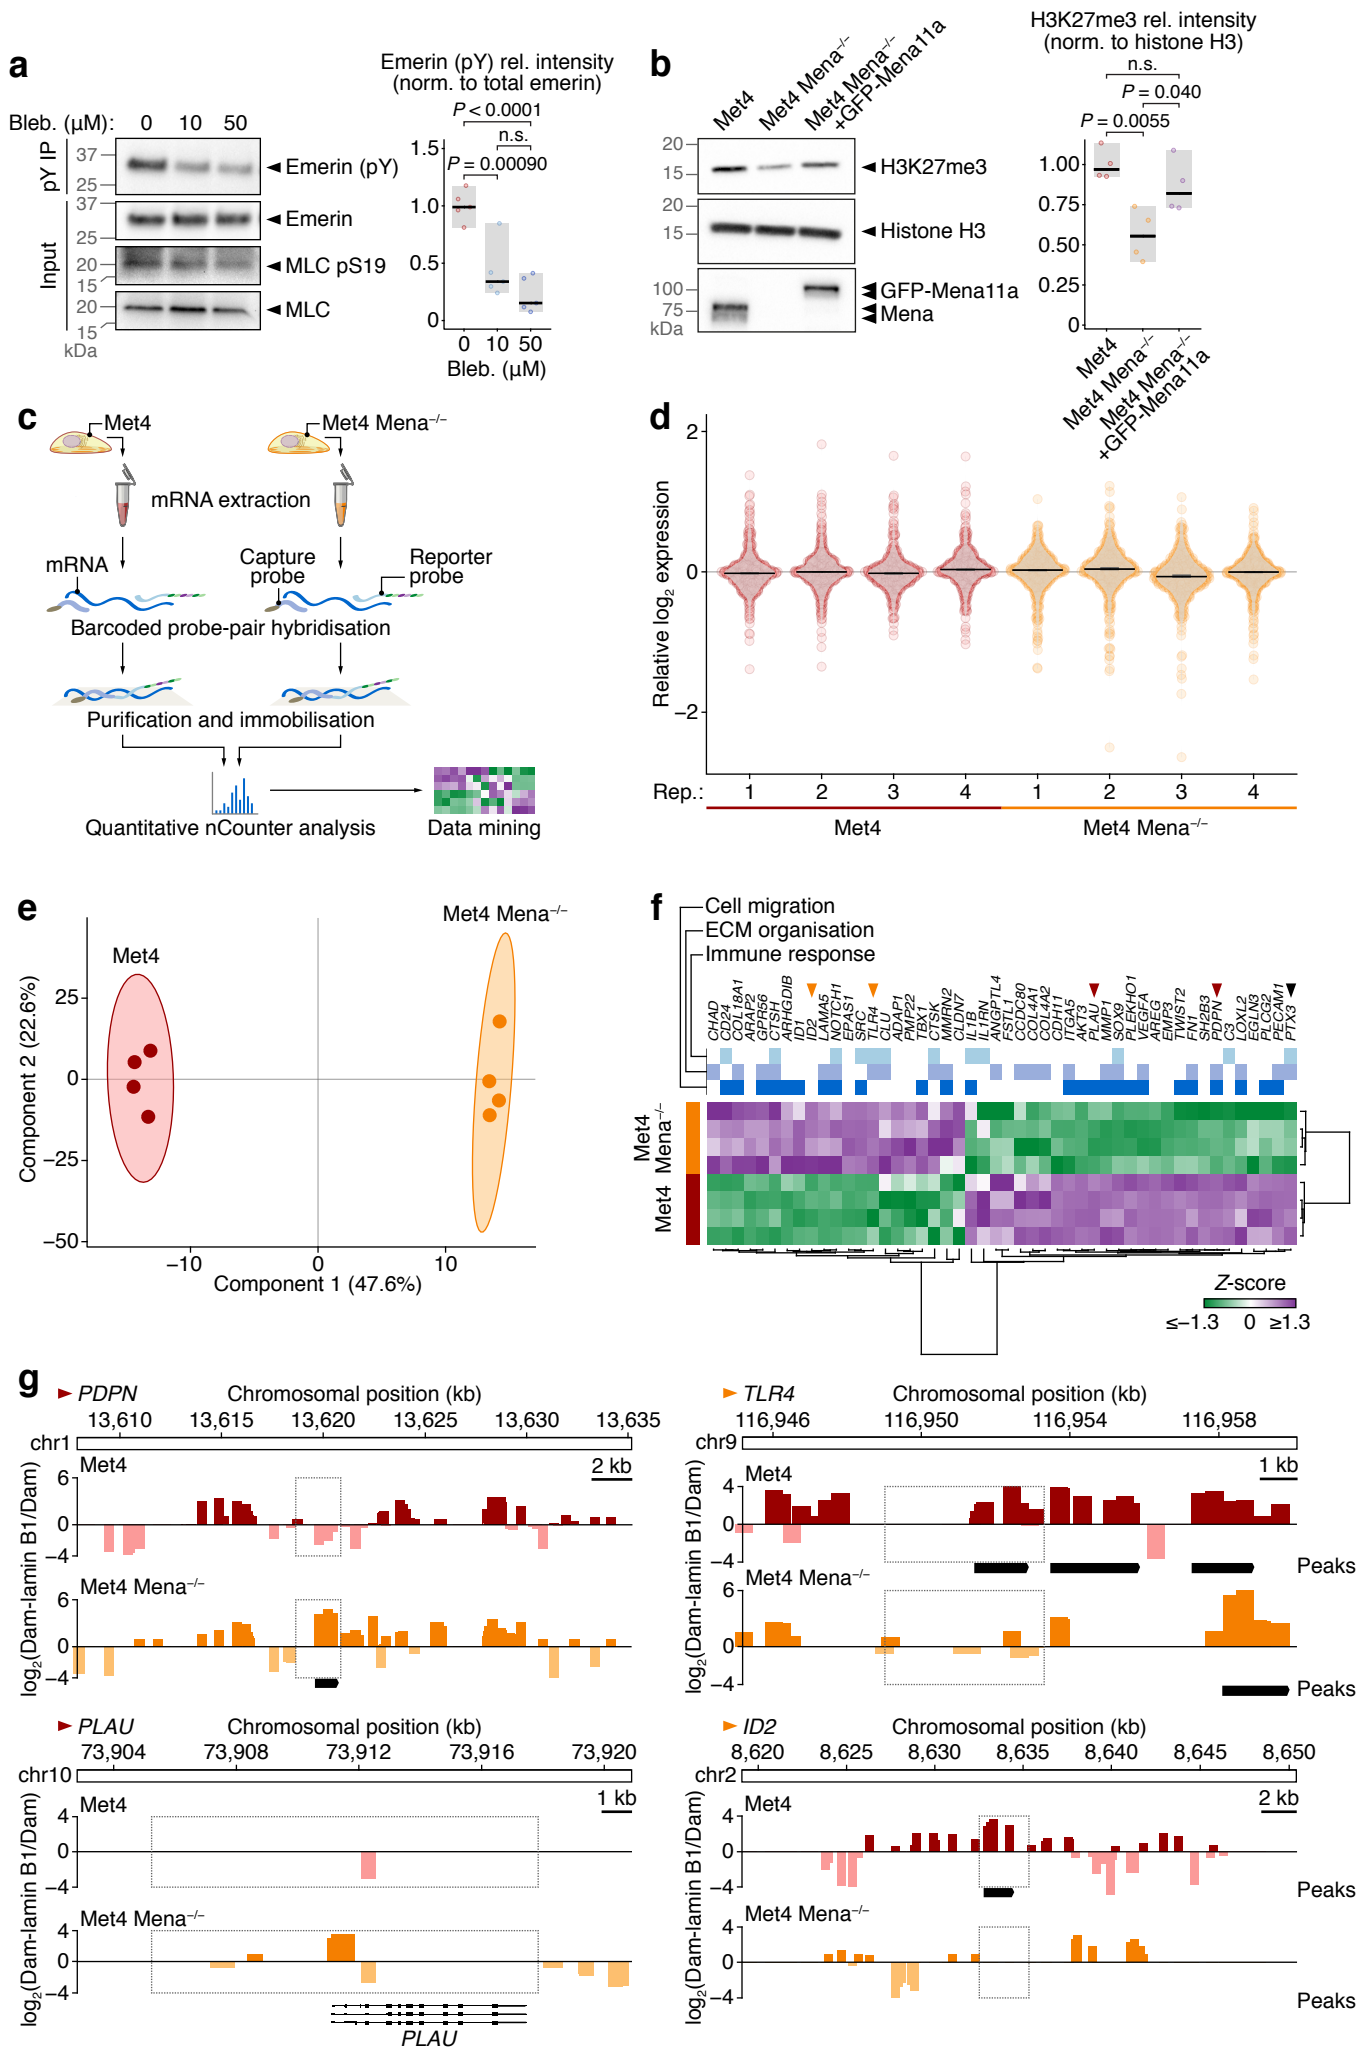

Supplementary Fig. 4 | See next page for caption.

**Supplementary Fig. 4 | Regulation of cSCC gene expression by Mena.** **a** Emerin tyrosine phosphorylation after treatment of cells with blebbistatin. Met4 cells were treated with 0 (vehicle control), 10 or 50  $\mu$ M blebbistatin (bleb.) for 2 h. Emerin tyrosine phosphorylation was detected by phosphotyrosine (pY) IP followed by western blotting for emerin; densitometric intensities were normalised (norm.) to total emerin (lysate) and expressed relative (rel.) to vehicle control (right panel). Black bar, median; light grey box, range. Statistical analysis, one-way ANOVA with Tukey's correction ( $n = 5$  independent experiments). MLC, myosin light chain. **b** Western blot analysis of H3K27me3 in Met4, Met4 Mena<sup>-/-</sup> and Met4 Mena<sup>-/-</sup> +GFP-Mena11a cell lysates. Densitometric intensities were normalised to histone H3 and expressed relative to Met4 cells (right panel). Black bar, median; light grey box, range. Statistical analysis, one-way ANOVA with Tukey's correction ( $n = 4$  independent experiments). **c** Workflow for multiplexed digital quantification of the expression of 770 genes associated with cancer progression. Dark blue strand, messenger RNA (mRNA). **d** Normalised cancer progression gene expression data across independent biological replicate (rep.) analyses for Met4 and Met4 Mena<sup>-/-</sup> cells. Black bar, median; dark grey box, 95% confidence interval; light grey silhouette, probability density. Most 95% confidence intervals are smaller than the weight of the corresponding median line (black bar) and so are not visible. **e** Principal component analysis of cancer progression gene expression for Met4 and Met4 Mena<sup>-/-</sup> cells. **f** Hierarchical cluster analysis of cancer progression genes significantly differentially regulated between Met4 and Met4 Mena<sup>-/-</sup> cells ( $q < 0.05$ , two-sided  $t$ -test with Benjamini-Hochberg correction;  $n = 4$  independent biological replicates). Data are as for Fig. 4b with additional annotation. The most downregulated gene upon Mena depletion, *PTX3*, is indicated with a black arrowhead; the next two most downregulated genes in Mena-deficient cells, *PDPN* and *PLAU*, are indicated with red arrowheads; the two most upregulated genes in Mena-deficient cells, *TLR4* and *ID2*, are indicated with orange arrowheads. **g** Nuclear lamina association profiles identified by lamin B1 DamID sequencing (DamID-seq). Lamin B1 DamID-seq tracks were generated from Met4 (red, top profile) and Met4 Mena<sup>-/-</sup> (orange, bottom profile) cells, and regions spanning putative enhancer regions for the most dysregulated genes identified by multiplexed gene expression analysis (arrowheads in **f**) were selected. Tracks spanning enhancer regions associated with *PDPN* (27-kb region of chromosome 1; top left panel), *PLAU* (18-kb region of chromosome 10; bottom left panel), *TLR4* (15-kb region of chromosome 9; top right panel) and *ID2* (31-kb region of chromosome 2; bottom right panel) are shown (human reference genome GRCh38). Tracks spanning the enhancer region associated with *PTX3* are shown in Fig. 4e. Enhancer regions associated with *PDPN* (GeneHancer identifier GH01J013618), *PLAU* (GeneHancer identifier GH10J073905), *TLR4* (GeneHancer identifier GH09J116950) and *ID2* (GeneHancer identifier GH02J008632) are indicated with dotted boxes. Significantly called DamID peaks are indicated with black bars (FDR < 5%;  $n = 2$  independent experiments). Scale bar, 2 kb (*PDPN* and *ID2*) or 1 kb (*PLAU* and *TLR4*). n.s., not significant.

---

**Supplementary Table 1 | Oligonucleotides used in this study**

| <b>Purpose</b> | <b>Name</b>                       | <b>Sequence (5'-3')</b>                                      |
|----------------|-----------------------------------|--------------------------------------------------------------|
| CRISPR/Cas9    | <i>ENAH</i> exon 2 guide, forward | TTTCTTGGCTTTATATATCTTGTGGAAAGGACGAAACACCGGAGATGCTAGACAGGTGTA |
| CRISPR/Cas9    | <i>ENAH</i> exon 2 guide, reverse | GACTAGCCTTATTTTAACTTGCTATTTCTAGCTCTAAACTACACCTGTCTAGCATCTCC  |
| Sequencing     | <i>ENAH</i> , forward             | ATGAGTGAACAGAGTATCTG                                         |
| Sequencing     | <i>ENAH</i> , reverse             | CTATGCAGTATTTGACTTGC                                         |
| Sequencing     | M13, forward                      | TGTAAAACGACGGCCAGT                                           |
| Sequencing     | M13, reverse                      | CAGGAAACAGCTATGAC                                            |
| DamID          | AdR_PCR                           | GGTCGCGGCCGAGGATC                                            |
| DamID          | Ad1_noMX                          | AATGATACGGCGACCACCGAGATCTACACTCGTCGGCAGCGTCAGATGTG           |
| DamID          | Ad2.3                             | CAAGCAGAAGACGGCATAACGAGATTTCTGCCTGTCTCGTGGGCTCGGAGATGT       |
| DamID          | Ad2.4                             | CAAGCAGAAGACGGCATAACGAGATGCTCAGGAGTCTCGTGGGCTCGGAGATGT       |
| DamID          | Ad2.5                             | CAAGCAGAAGACGGCATAACGAGATAGGAGTCCGTCTCGTGGGCTCGGAGATGT       |
| DamID          | Ad2.6                             | CAAGCAGAAGACGGCATAACGAGATCATGCCTAGTCTCGTGGGCTCGGAGATGT       |
| DamID          | Ad2.7                             | CAAGCAGAAGACGGCATAACGAGATGTAGAGAGGTCTCGTGGGCTCGGAGATGT       |
| DamID          | Ad2.8                             | CAAGCAGAAGACGGCATAACGAGATCCTCTCTGGTCTCGTGGGCTCGGAGATGT       |
| qPCR           | <i>PTX3</i> RT-PCR, forward       | CGTCTCTCCAGCAATGCATC                                         |
| qPCR           | <i>PTX3</i> RT-PCR, reverse       | AAGAGCTTGTCCCATTCGA                                          |
| qPCR           | <i>GAPDH</i> RT-PCR, forward      | GGACCTGACCTGCCGTCTAG                                         |
| qPCR           | <i>GAPDH</i> RT-PCR, reverse      | TGGTGCTCAGTGTAGCCAG                                          |
| qPCR           | <i>PTX3</i> DamID (TF2), forward  | TACAAGGCGGGAAAATTGGC                                         |
| qPCR           | <i>PTX3</i> DamID (TF2), reverse  | TATAACGGGCCAGTGGACTC                                         |

**Supplementary Table 2 | STED microscopy laser settings**

| <b>Dye</b> | <b>Brand</b> | <b>Supplier</b>      | <b>Wavelength (nm)</b> |                  |                  | <b>Time gating (ns)</b> |
|------------|--------------|----------------------|------------------------|------------------|------------------|-------------------------|
|            |              |                      | <b>Excitation</b>      | <b>Detection</b> | <b>Depletion</b> |                         |
| CF680R     | Biotium      | Cambridge Bioscience | 670                    | 680–750          | 775              | 1.5–8.0                 |
| STAR RED   | Abberior     | Sigma-Aldrich        | 635                    | 645–670          | 775              | 0.3–8.0                 |
| STAR 580   | Abberior     | Sigma-Aldrich        | 590                    | 600–640          | 775              | 0.3–8.0                 |
| STAR 488   | Abberior     | Sigma-Aldrich        | 490                    | 500–580          | 592              | 0.5–8.0                 |
