# Supplementary material for: Mena regulates nesprin-2 to control actin–nuclear lamina associations, trans-nuclear membrane signalling and gene expression
Source: PubMed Central journal article supplement (PMC10036544; doi:10.1038/s41467-023-37021-x), 2023-03-23
Supplement: 41467_2023_37021_MOESM4_ESM.pdf [file 41467_2023_37021_MOESM4_ESM.pdf]

**File name: Supplementary Data 1**

**Description:** MS-based proteomic analysis of patient-derived cSCC integrin adhesion complexes.

**File name: Supplementary Data 2**

**Description:** Core cSCC adhesion proteins quantified by LC-MS/MS.

**File name: Supplementary Data 3**

**Description:** Multiplexed gene expression analysis of detected cancer progression genes.

**File name: Supplementary Data 4**

**Description:** Differentially regulated cancer progression genes upon Mena depletion.
